# Supplementary material for: In situ cross-linked and highly carboxylated poly(vinyl alcohol) nanofibrous membranes for efficient adsorption of proteins
Source: Royal Society of Chemistry journal article supplement (doi:10.1039/c5tb01192b), 2015-01-01
Supplement: c5tb01192b1.pdf [file c5tb01192b1.pdf]

## Supporting information for

### **In-situ cross-linked and highly carboxylated poly(vinyl alcohol) nanofibrous membranes for efficient adsorption of proteins**

Xiaoliang Wang,<sup>‡a</sup> Qiuxia Fu,<sup>‡a</sup> Xueqin Wang,<sup>b</sup> Yang Si,<sup>b</sup> Jianyong Yu,<sup>c</sup> Xueli Wang<sup>\*a</sup> and Bin Ding<sup>\*a,b,c</sup>

<sup>a</sup> Key Laboratory of Textile Science & Technology, Ministry of Education, College of Textiles, Donghua University, Shanghai 201620, China

<sup>b</sup> State Key Laboratory for Modification of Chemical Fibers and Polymer Materials, College of Materials Science and Engineering, Donghua University, Shanghai 201620, China

<sup>c</sup> Nanomaterials Research Center, Modern Textile Institute, Donghua University, Shanghai 200051, China

<sup>‡</sup> These authors contributed equally to this work.

\* Corresponding author: Prof. Xueli Wang (E-mail: wxl@dhu.edu.cn)

Prof. Bin Ding (E-mail: binding@dhu.edu.cn)

**Table S1 Solution properties and diameter of the resultant nanofibers**

| MAH to PVA<br>molar ratio (%) | Viscosity<br>(mPa.S) | Conductivity<br>(mS cm <sup>-1</sup> ) | Average fiber<br>diameter (nm) |
|-------------------------------|----------------------|----------------------------------------|--------------------------------|
| 0                             | 425                  | 0.57                                   | 320                            |
| 5                             | 472                  | 20.5                                   | 284                            |
| 10                            | 493                  | 23.6                                   | 265                            |
| 15                            | 507                  | 27.3                                   | 248                            |
| 20                            | 522                  | 31.2                                   | 233                            |
| 30                            | 569                  | 34.7                                   | 226                            |
| 40                            | 584                  | 37.6                                   | 223                            |

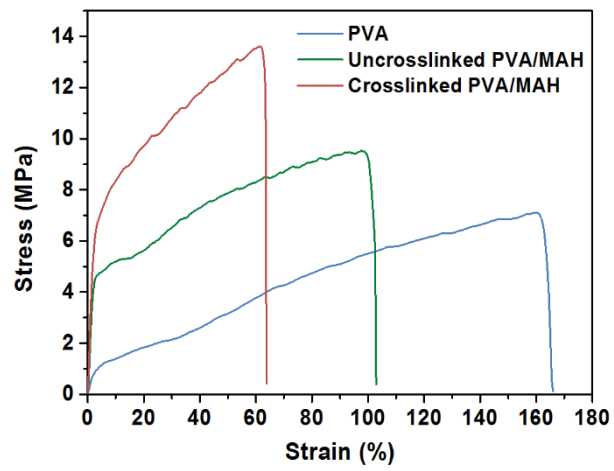

Fig. S1 Stress–strain curves for the relevant pristine PVA, uncross-linked PVA/MAH, and cross-linked PVA/MAH nanofibrous membranes.

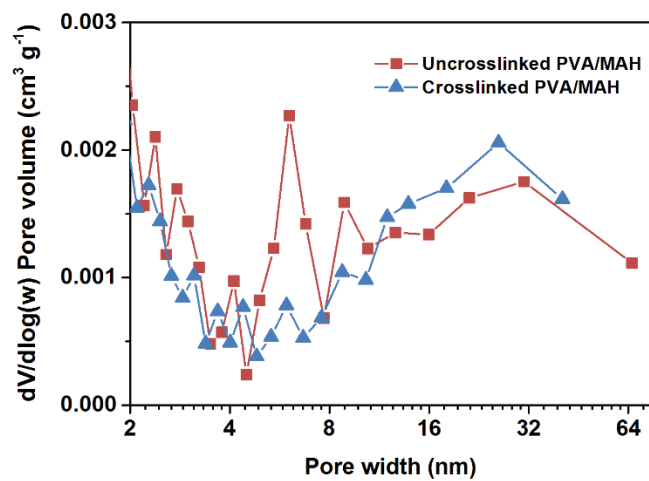

Fig. S2 Pore distribution of uncross-linked and cross-linked PVA/MAH nanofibrous membranes using the BJH method.

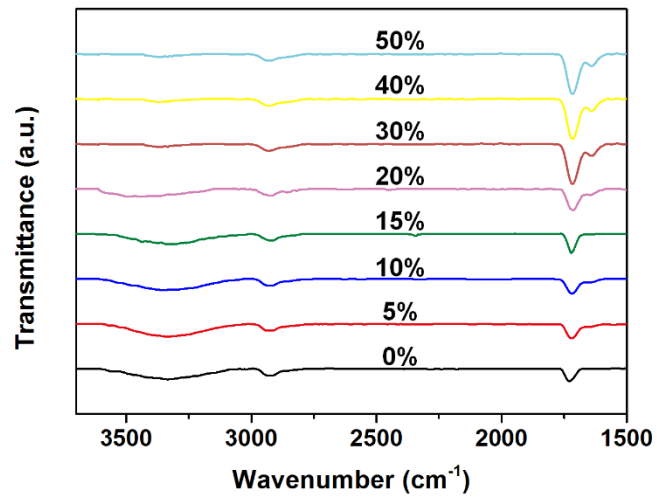

Fig. S3 FT-IR spectra of PVA/MAH nanofibrous membranes at different MAH to PVA molar ratio.

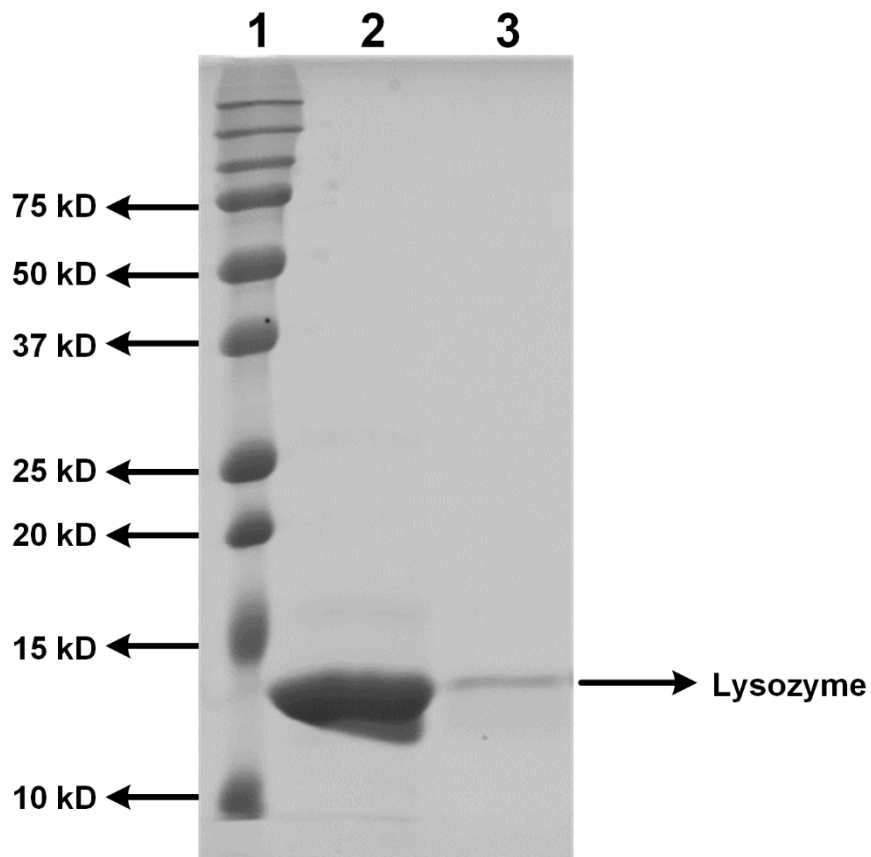

Fig. S4 SDS-PAGE analysis (Coomassie blue staining) showing the adsorption performance towards lysozyme: lane 1, a protein ladder; lane 2, the pristine protein solution; lane 3, the protein solution after adsorption by PVA/MAH nanofibrous membranes.

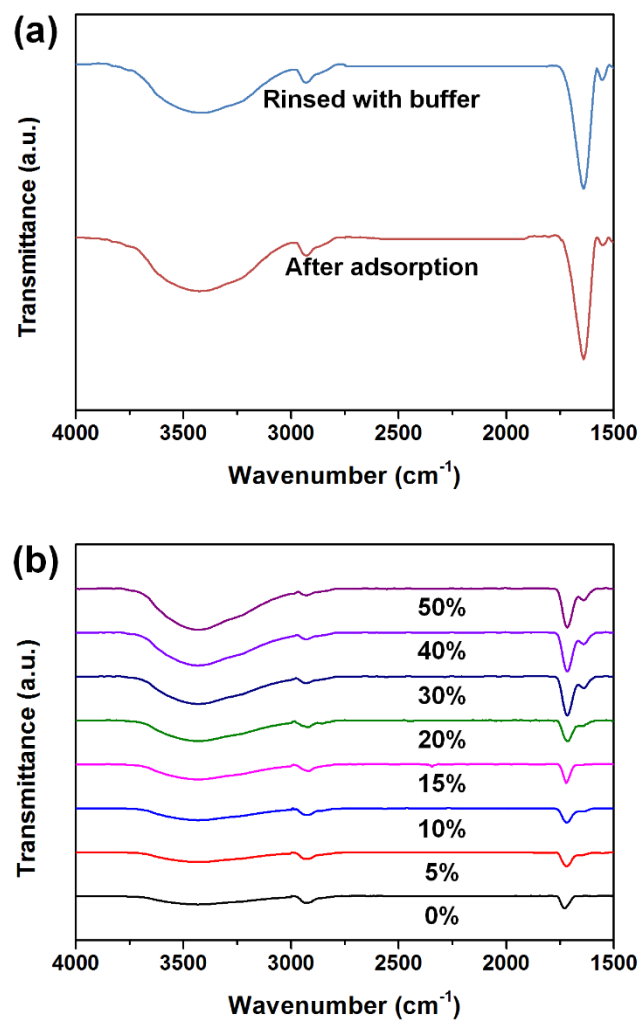

Fig. S5 (a) FT-IR spectra of PVA/MAH nanofibrous membranes after adsorption lysozyme and after rinsing with phosphate buffer. (b) FT-IR spectra of PVA/MAH nanofibrous membranes with different MAH to PVA molar ratio after adsorption lysozyme and rinsing with phosphate buffer.

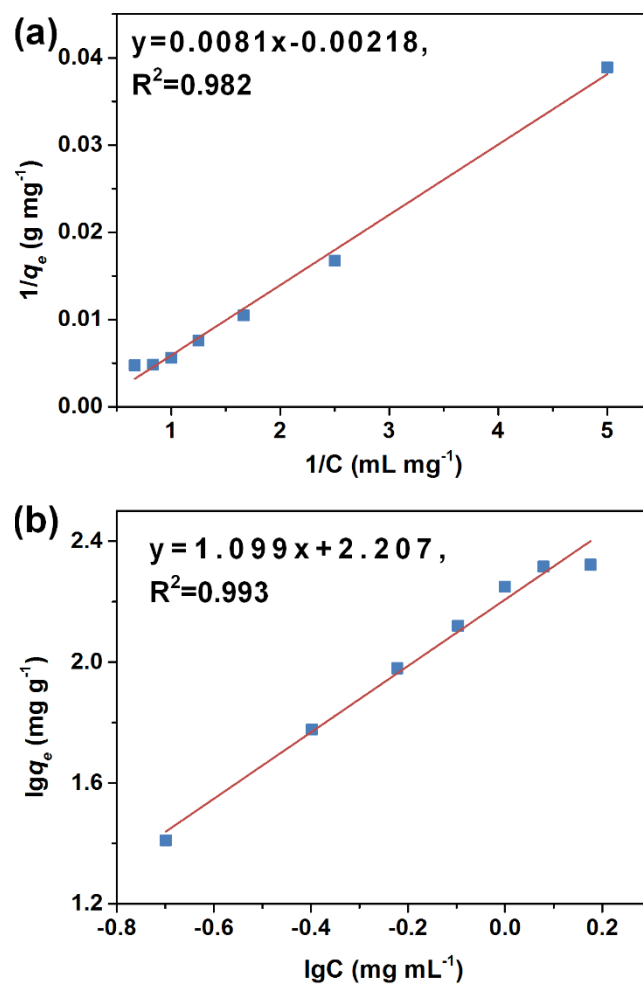

Fig. S7 The fitting curves of (a) Langmuir and (b) Freundlich isotherm models for lysozyme adsorption on PVA/MAH nanofibrous membranes.
